# Supplementary material
Source: publisher figshare collection journal article supplement (https://sage.figshare.com/ndownloader/files/12759800)
Supplement: Supplementary file 1 [file 12759800]

**Confronting Human Trafficking: The Role of State Capacity**

**Online Appendix**

**Contents:**

**Table A1:** State Capacity and Human Trafficking in Source Countries (Models with the Components of the WGI Dataset)

**Table A2.** State Capacity and Human Trafficking in Destination Countries (Models with the Components of the WGI Dataset)

**Table A3.** State Capacity and Human Trafficking in Source Countries (Models with the Tax/Governance, GDP, UN Protocol, and Democracy Interaction Terms

**Table A4.** State Capacity and Human Trafficking in Source Countries

(Models with the Tax/Governance, GDP, UN Protocol, and Democracy Interaction Terms)

**Table A5.** State Capacity and Human Trafficking in Destination Countries

(Models with the Tax/Governance, GDP, UN Protocol, and Democracy Interaction Terms)

**Table A6.** State Capacity and Human Trafficking in Destination Countries (Models with the Tax/Governance, GDP, UN Protocol, and Democracy Interaction Terms)

**Table A7.** State Capacity and Human Trafficking in Source Countries (Models with Country and Region Fixed-effects)

**Table A8.** State Capacity and Human Trafficking in Destination Countries (Models with Country and Region Fixed-effects)

**Table A9.** State Capacity and Human Trafficking in Destination Countries (Ordered Logit Models with the UNODC HT Inflows data)

**Table A10.** State Capacity and Human Trafficking in Destination Countries (Additional Models with the Foreign and Domestic Movement Variables)

**Table A11.** State Capacity and Human Trafficking in Destination Countries (Additional Models with the CIRI Judicial Independence Measure Variable)

**Table A12.** State Capacity and Human Trafficking (Ordered Logit Models with the Prevention Outcome Variable)

**Table A13.** Summary Statistics

**Table A1.** **State Capacity and Human Trafficking in Source Countries**

**(Models with the Components of the WGI Dataset)**

|  |  |  |  |  |  |  |
| --- | --- | --- | --- | --- | --- | --- |
|  | DV: HT Forced Labor  (Source Country) | | | DV: HT Forced Prostitution  (Source Country) | | |
| Control of Corruption | -0.017 |  |  | 0.025 |  |  |
|  | (0.216) |  |  | (0.218) |  |  |
| Govt Effectiveness |  | -0.029 |  |  | 0.203 |  |
|  |  | (0.232) |  |  | (0.276) |  |
| Rule of Law |  |  | 0.307 |  |  | 0.383 |
|  |  |  | (0.227) |  |  | (0.270) |
| Fiscal Capacity | -2.542** | -2.537** | -2.809** | -3.205** | -3.305** | -3.414** |
|  | (1.253) | (1.252) | (1.290) | (1.388) | (1.371) | (1.424) |
| GDP per Capita | 0.551*** | 0.557*** | 0.451*** | 0.641*** | 0.580*** | 0.541*** |
|  | (0.134) | (0.142) | (0.133) | (0.136) | (0.153) | (0.142) |
| Democracy | -0.079*** | -0.079*** | -0.081*** | 0.007 | 0.003 | 0.002 |
|  | (0.025) | (0.026) | (0.025) | (0.023) | (0.023) | (0.023) |
| UN Trafficking Protocol | 0.302 | 0.301 | 0.335 | 0.302 | 0.308 | 0.319 |
|  | (0.214) | (0.214) | (0.215) | (0.220) | (0.221) | (0.223) |
| Repression | 0.040 | 0.040 | 0.015 | 0.088 | 0.081 | 0.062 |
|  | (0.083) | (0.080) | (0.082) | (0.061) | (0.061) | (0.064) |
| Worker Rights | -0.007 | -0.006 | -0.072 | -0.038 | -0.064 | -0.102 |
|  | (0.165) | (0.168) | (0.170) | (0.189) | (0.193) | (0.196) |
| Women's Econ. Rights | -0.296* | -0.295** | -0.345** | -0.317* | -0.336** | -0.358** |
|  | (0.152) | (0.150) | (0.153) | (0.167) | (0.169) | (0.168) |
| Population | 0.471*** | 0.472*** | 0.459*** | 0.451*** | 0.435*** | 0.431*** |
|  | (0.114) | (0.114) | (0.112) | (0.121) | (0.125) | (0.121) |
| HT Source Country | 0.094 | 0.096 | 0.141 | -0.093 | -0.083 | -0.029 |
|  | (0.329) | (0.324) | (0.327) | (0.320) | (0.323) | (0.330) |
| Time Trend | -0.419*** | -0.418*** | -0.431*** | -0.377*** | -0.380*** | -0.380*** |
|  | (0.038) | (0.038) | (0.039) | (0.042) | (0.043) | (0.043) |
| Last HT Incidence | 0.416*** | 0.416*** | 0.416*** | 0.298*** | 0.300*** | 0.297*** |
|  | (0.040) | (0.040) | (0.040) | (0.040) | (0.041) | (0.041) |
| Report Count | -0.008 | -0.008 | -0.008 | -0.016** | -0.016** | -0.017** |
|  | (0.006) | (0.006) | (0.006) | (0.007) | (0.007) | (0.007) |
| Observations | 1,167 | 1,167 | 1,167 | 1,167 | 1,167 | 1,167 |
| Chi2 | 230.39 | 230.82 | 226.47 | 133.48 | 132.5 | 131 |
| Number of Countries | 139 | 139 | 139 | 139 | 139 | 139 |

Notes: Robust standard errors adjusted for clustering over country appear in parentheses.

*** p<0.01, ** p<0.05, * p<0.1 All time-variant explanatory variables are lagged at *t*–1.

**Table A2. State Capacity and Human Trafficking in Destination Countries**

**(Models with the Components of the WGI Dataset)**

|  | DV: HT Forced Labor  (Source Country) | | | DV: HT Forced Prostitution  (Source Country) | | |
| --- | --- | --- | --- | --- | --- | --- |
| Control of Corruption | -0.017 |  |  | 0.025 |  |  |
|  | (0.216) |  |  | (0.218) |  |  |
| Govt Effectiveness |  | -0.029 |  |  | 0.203 |  |
|  |  | (0.232) |  |  | (0.276) |  |
| Rule of Law |  |  | 0.307 |  |  | 0.383 |
|  |  |  | (0.227) |  |  | (0.270) |
| Fiscal Capacity | -2.542** | -2.537** | -2.809** | -3.205** | -3.305** | -3.414** |
|  | (1.253) | (1.252) | (1.290) | (1.388) | (1.371) | (1.424) |
| GDP per Capita | 0.551*** | 0.557*** | 0.451*** | 0.641*** | 0.580*** | 0.541*** |
|  | (0.134) | (0.142) | (0.133) | (0.136) | (0.153) | (0.142) |
| Democracy | -0.079*** | -0.079*** | -0.081*** | 0.007 | 0.003 | 0.002 |
|  | (0.025) | (0.026) | (0.025) | (0.023) | (0.023) | (0.023) |
| UN Trafficking Protocol | 0.302 | 0.301 | 0.335 | 0.302 | 0.308 | 0.319 |
|  | (0.214) | (0.214) | (0.215) | (0.220) | (0.221) | (0.223) |
| Repression | 0.040 | 0.040 | 0.015 | 0.088 | 0.081 | 0.062 |
|  | (0.083) | (0.080) | (0.082) | (0.061) | (0.061) | (0.064) |
| Worker Rights | -0.007 | -0.006 | -0.072 | -0.038 | -0.064 | -0.102 |
|  | (0.165) | (0.168) | (0.170) | (0.189) | (0.193) | (0.196) |
| Women's Econ. Rights | -0.296* | -0.295** | -0.345** | -0.317* | -0.336** | -0.358** |
|  | (0.152) | (0.150) | (0.153) | (0.167) | (0.169) | (0.168) |
| Population | 0.471*** | 0.472*** | 0.459*** | 0.451*** | 0.435*** | 0.431*** |
|  | (0.114) | (0.114) | (0.112) | (0.121) | (0.125) | (0.121) |
| HT Source Country | 0.094 | 0.096 | 0.141 | -0.093 | -0.083 | -0.029 |
|  | (0.329) | (0.324) | (0.327) | (0.320) | (0.323) | (0.330) |
| Time Trend | -0.419*** | -0.418*** | -0.431*** | -0.377*** | -0.380*** | -0.380*** |
|  | (0.038) | (0.038) | (0.039) | (0.042) | (0.043) | (0.043) |
| Last HT Incidence | 0.416*** | 0.416*** | 0.416*** | 0.298*** | 0.300*** | 0.297*** |
|  | (0.040) | (0.040) | (0.040) | (0.040) | (0.041) | (0.041) |
| Report Count | -0.008 | -0.008 | -0.008 | -0.016** | -0.016** | -0.017** |
|  | (0.006) | (0.006) | (0.006) | (0.007) | (0.007) | (0.007) |
| Observations | 1,167 | 1,167 | 1,167 | 1,167 | 1,167 | 1,167 |
| Chi2 | 230.39 | 230.82 | 226.47 | 133.48 | 132.5 | 131 |
| Number of Countries | 139 | 139 | 139 | 139 | 139 | 139 |

Notes: Robust standard errors adjusted for clustering over country appear in parentheses.

*** p<0.01, ** p<0.05, * p<0.1 All time-variant explanatory variables are lagged at *t*–1.

**Table A3. State Capacity and Human Trafficking in Source Countries**

**(Models with the Tax/Governance, GDP, UN Protocol, and Democracy Interaction Terms)**

|  | DV: HT Forced Labor (Source Country) | | | | | | |
| --- | --- | --- | --- | --- | --- | --- | --- |
| Fiscal Capacity | -3.727** | -2.528 | -3.716* | -7.201*** | -3.643** | -3.797** | -3.638** |
|  | (1.792) | (8.897) | (1.996) | (2.584) | (1.817) | (1.866) | (1.796) |
| Bureaucratic Efficacy | -0.044 | -0.056 | -0.058 | -0.064 | -0.605 | -0.163 | -0.164 |
|  | (0.152) | (0.102) | (0.105) | (0.104) | (0.402) | (0.113) | (0.127) |
| GDP per Capita | -0.785*** | -0.762*** | -0.785*** | -0.769*** | -0.733*** | -0.842*** | -0.779*** |
|  | (0.215) | (0.282) | (0.218) | (0.210) | (0.224) | (0.219) | (0.212) |
| Democracy | 0.023 | 0.023 | 0.023 | 0.019 | 0.026 | 0.046 | 0.024 |
|  | (0.027) | (0.027) | (0.048) | (0.027) | (0.028) | (0.031) | (0.027) |
| UN Trafficking Protocol | 0.384 | 0.382 | 0.383 | -0.482 | 0.430* | 0.396* | 0.501* |
|  | (0.236) | (0.236) | (0.234) | (0.518) | (0.236) | (0.233) | (0.259) |
| Repression | 0.062 | 0.062 | 0.062 | 0.061 | 0.068 | 0.071 | 0.065 |
|  | (0.083) | (0.083) | (0.083) | (0.082) | (0.086) | (0.084) | (0.082) |
| Worker Rights | -0.086 | -0.086 | -0.087 | -0.097 | -0.123 | -0.106 | -0.103 |
|  | (0.200) | (0.200) | (0.200) | (0.201) | (0.202) | (0.201) | (0.201) |
| Women's Econ. Rights | 0.071 | 0.071 | 0.069 | 0.089 | 0.013 | 0.015 | 0.054 |
|  | (0.161) | (0.162) | (0.163) | (0.164) | (0.164) | (0.165) | (0.161) |
| Population | 0.581*** | 0.583*** | 0.580*** | 0.560*** | 0.573*** | 0.574*** | 0.567*** |
|  | (0.134) | (0.131) | (0.133) | (0.134) | (0.136) | (0.134) | (0.133) |
| HT Destination Country | 0.146 | 0.145 | 0.142 | 0.132 | 0.157 | 0.144 | 0.175 |
|  | (0.233) | (0.232) | (0.227) | (0.229) | (0.231) | (0.224) | (0.225) |
| Time Trend | -0.319*** | -0.319*** | -0.319*** | -0.326*** | -0.326*** | -0.315*** | -0.326*** |
|  | (0.041) | (0.041) | (0.041) | (0.041) | (0.041) | (0.041) | (0.042) |
| Last HT Incidence | 0.467*** | 0.467*** | 0.467*** | 0.473*** | 0.462*** | 0.469*** | 0.459*** |
|  | (0.049) | (0.049) | (0.049) | (0.048) | (0.048) | (0.049) | (0.049) |
| Report Count | -0.019*** | -0.019*** | -0.019*** | -0.018*** | -0.020*** | -0.018*** | -0.018*** |
|  | (0.006) | (0.006) | (0.006) | (0.006) | (0.006) | (0.006) | (0.006) |
| Fiscal Cap.* Bur. Cap. | -0.074 |  |  |  |  |  |  |
|  | (0.555) |  |  |  |  |  |  |
| Fiscal Cap.* GDP |  | -0.148 |  |  |  |  |  |
|  |  | (1.017) |  |  |  |  |  |
| Fiscal Cap.*Democracy |  |  | 0.004 |  |  |  |  |
|  |  |  | (0.232) |  |  |  |  |
| Fiscal Cap.*UN Protocol |  |  |  | 5.366* |  |  |  |
|  |  |  |  | (3.012) |  |  |  |
| Bur Eff.* GDP |  |  |  |  | 0.060 |  |  |
|  |  |  |  |  | (0.040) |  |  |
| Bur Eff.*Democracy |  |  |  |  |  | 0.019** |  |
|  |  |  |  |  |  | (0.009) |  |
| Bur Eff.*UN Protocol |  |  |  |  |  |  | 0.162* |
|  |  |  |  |  |  |  | (0.092) |
| Observations | 1,167 | 1,167 | 1,167 | 1,167 | 1,167 | 1,167 | 1,167 |
| Chi2 | 227.7 | 228.01 | 228.28 | 238.21 | 249.13 | 235.78 | 241.36 |
| Number of Countries | 139 | 139 | 139 | 139 | 139 | 139 | 139 |

Notes: Robust standard errors adjusted for clustering over country appear in parentheses.

*** p<0.01, ** p<0.05, * p<0.1 All time-variant explanatory variables are lagged at *t*–1.

**Table A4. State Capacity and Human Trafficking in Source Countries**

**(Models with the Tax/Governance, GDP, UN Protocol, and Democracy Interaction Terms)**

|  | DV: Forced Prostitution (Source Country) | | | | | | |
| --- | --- | --- | --- | --- | --- | --- | --- |
| Fiscal Capacity | -5.425*** | 15.535 | -4.380** | -5.611** | -5.038*** | -5.046*** | -5.011*** |
|  | (1.609) | (10.710) | (1.731) | (2.204) | (1.648) | (1.551) | (1.568) |
| Bureaucratic Efficacy | 0.049 | -0.139 | -0.135 | -0.144 | 0.794 | -0.098 | -0.150 |
|  | (0.163) | (0.115) | (0.111) | (0.108) | (0.523) | (0.127) | (0.121) |
| GDP per Capita | -0.405 | -0.032 | -0.422* | -0.403 | -0.527* | -0.390 | -0.408 |
|  | (0.252) | (0.353) | (0.255) | (0.246) | (0.271) | (0.248) | (0.251) |
| Democracy | 0.101*** | 0.104*** | 0.125** | 0.102*** | 0.097*** | 0.093*** | 0.103*** |
|  | (0.032) | (0.033) | (0.055) | (0.032) | (0.033) | (0.031) | (0.033) |
| UN Trafficking Protocol | 0.375* | 0.454* | 0.370* | 0.173 | 0.293 | 0.359* | 0.373* |
|  | (0.212) | (0.247) | (0.204) | (0.392) | (0.215) | (0.210) | (0.213) |
| Repression | 0.133 | 0.178 | 0.129 | 0.134 | 0.120 | 0.131 | 0.137 |
|  | (0.101) | (0.110) | (0.100) | (0.101) | (0.092) | (0.100) | (0.101) |
| Worker Rights | -0.370* | -0.354* | -0.376** | -0.383** | -0.313 | -0.370** | -0.380** |
|  | (0.189) | (0.201) | (0.182) | (0.182) | (0.194) | (0.185) | (0.183) |
| Women's Econ. Rights | -0.003 | -0.051 | 0.009 | -0.004 | 0.060 | 0.019 | -0.009 |
|  | (0.151) | (0.175) | (0.141) | (0.141) | (0.151) | (0.141) | (0.144) |
| Population | 0.671*** | 0.731*** | 0.644*** | 0.644*** | 0.660*** | 0.660*** | 0.649*** |
|  | (0.163) | (0.161) | (0.162) | (0.160) | (0.166) | (0.162) | (0.161) |
| HT Destination Country | -0.369 | -0.373 | -0.402 | -0.417 | -0.426 | -0.402 | -0.413 |
|  | (0.280) | (0.323) | (0.267) | (0.271) | (0.272) | (0.271) | (0.278) |
| Time Trend | -0.367*** | -0.457*** | -0.345*** | -0.356*** | -0.339*** | -0.357*** | -0.357*** |
|  | (0.047) | (0.053) | (0.045) | (0.046) | (0.046) | (0.046) | (0.046) |
| Last HT Incidence | 0.367*** | 0.385*** | 0.360*** | 0.361*** | 0.380*** | 0.365*** | 0.362*** |
|  | (0.045) | (0.051) | (0.044) | (0.045) | (0.046) | (0.045) | (0.045) |
| Report Count | -0.039*** | -0.039*** | -0.034*** | -0.035*** | -0.033*** | -0.036*** | -0.035*** |
|  | (0.008) | (0.008) | (0.007) | (0.007) | (0.007) | (0.007) | (0.007) |
| Fiscal Cap.* Bur. Cap. | -1.076* |  |  |  |  |  |  |
|  | (0.589) |  |  |  |  |  |  |
| Fiscal Cap.* GDP |  | -2.539* |  |  |  |  |  |
|  |  | (1.306) |  |  |  |  |  |
| Fiscal Cap.*Democracy |  |  | -0.150 |  |  |  |  |
|  |  |  | (0.229) |  |  |  |  |
| Fiscal Cap.*UN Protocol |  |  |  | 1.173 |  |  |  |
|  |  |  |  | (1.904) |  |  |  |
| Bur Eff.* GDP |  |  |  |  | -0.101* |  |  |
|  |  |  |  |  | (0.052) |  |  |
| Bur Eff.*Democracy |  |  |  |  |  | -0.009 |  |
|  |  |  |  |  |  | (0.010) |  |
| Bur Eff.*UN Protocol |  |  |  |  |  |  | 0.010 |
|  |  |  |  |  |  |  | (0.065) |
| Observations | 1,167 | 1,167 | 1,167 | 1,167 | 1,167 | 1,167 | 1,167 |
| Chi2 | 220.32 | 259.39 | 207.7 | 215.86 | 192.79 | 220.29 | 211.44 |
| Number of Countries | 139 | 139 | 139 | 139 | 139 | 139 | 139 |

Notes: Robust standard errors adjusted for clustering over country appear in parentheses.

*** p<0.01, ** p<0.05, * p<0.1 All time-variant explanatory variables are lagged at *t*–1.

**Table A5. State Capacity and Human Trafficking in Destination Countries**

**(Models with the Tax/Governance, GDP, UN Protocol, and Democracy Interaction Terms)**

|  | DV: HT Force Labor (Destination Country) | | | | | | |
| --- | --- | --- | --- | --- | --- | --- | --- |
| Fiscal Capacity | -2.655** | -2.268 | -2.619 | -1.332 | -2.692** | -2.697** | -2.576** |
|  | (1.267) | (6.746) | (1.622) | (1.570) | (1.245) | (1.210) | (1.259) |
| Bureaucratic Efficacy | 0.030 | 0.033 | 0.032 | 0.039 | 0.328 | 0.133 | 0.060 |
|  | (0.113) | (0.080) | (0.080) | (0.079) | (0.311) | (0.093) | (0.085) |
| GDP per Capita | 0.514*** | 0.521*** | 0.514*** | 0.501*** | 0.476*** | 0.522*** | 0.506*** |
|  | (0.139) | (0.187) | (0.140) | (0.140) | (0.145) | (0.140) | (0.139) |
| Democracy | -0.080*** | -0.080*** | -0.079** | -0.079*** | -0.082*** | -0.099*** | -0.080*** |
|  | (0.025) | (0.026) | (0.038) | (0.026) | (0.026) | (0.028) | (0.026) |
| UN Trafficking Protocol | 0.311 | 0.311 | 0.312 | 0.782** | 0.287 | 0.325 | 0.302 |
|  | (0.215) | (0.214) | (0.217) | (0.385) | (0.212) | (0.217) | (0.213) |
| Repression | 0.033 | 0.033 | 0.033 | 0.034 | 0.033 | 0.026 | 0.031 |
|  | (0.082) | (0.082) | (0.082) | (0.081) | (0.082) | (0.083) | (0.082) |
| Worker Rights | -0.030 | -0.030 | -0.029 | -0.031 | -0.001 | 0.051 | -0.031 |
|  | (0.166) | (0.167) | (0.167) | (0.167) | (0.167) | (0.178) | (0.168) |
| Women's Econ. Rights | -0.312** | -0.311** | -0.311** | -0.314** | -0.295* | -0.285* | -0.309** |
|  | (0.154) | (0.153) | (0.154) | (0.153) | (0.159) | (0.160) | (0.153) |
| Population | 0.466*** | 0.467*** | 0.466*** | 0.470*** | 0.464*** | 0.490*** | 0.469*** |
|  | (0.114) | (0.114) | (0.113) | (0.113) | (0.112) | (0.113) | (0.113) |
| HT Source Country | 0.110 | 0.108 | 0.109 | 0.105 | 0.053 | 0.035 | 0.114 |
|  | (0.326) | (0.327) | (0.326) | (0.326) | (0.332) | (0.329) | (0.325) |
| Time Trend | -0.422*** | -0.422*** | -0.422*** | -0.427*** | -0.427*** | -0.438*** | -0.426*** |
|  | (0.039) | (0.038) | (0.038) | (0.038) | (0.039) | (0.039) | (0.038) |
| Last HT Incidence | 0.416*** | 0.416*** | 0.416*** | 0.418*** | 0.424*** | 0.429*** | 0.419*** |
|  | (0.040) | (0.040) | (0.040) | (0.040) | (0.041) | (0.041) | (0.040) |
| Report Count | -0.008 | -0.008 | -0.008 | -0.008 | -0.007 | -0.007 | -0.008 |
|  | (0.006) | (0.006) | (0.006) | (0.006) | (0.006) | (0.006) | (0.006) |
| Fiscal Cap.* Bur. Cap. | 0.008 |  |  |  |  |  |  |
|  | (0.438) |  |  |  |  |  |  |
| Fiscal Cap.* GDP |  | -0.046 |  |  |  |  |  |
|  |  | (0.795) |  |  |  |  |  |
| Fiscal Cap.*Democracy |  |  | -0.008 |  |  |  |  |
|  |  |  | (0.206) |  |  |  |  |
| Fiscal Cap.*UN Protocol |  |  |  | -2.814 |  |  |  |
|  |  |  |  | (1.828) |  |  |  |
| Bur Eff.* GDP |  |  |  |  | -0.032 |  |  |
|  |  |  |  |  | (0.033) |  |  |
| Bur Eff.*Democracy |  |  |  |  |  | -0.017* |  |
|  |  |  |  |  |  | (0.009) |  |
| Bur Eff.*UN Protocol |  |  |  |  |  |  | -0.053 |
|  |  |  |  |  |  |  | (0.060) |
| Observations | 1,167 | 1,167 | 1,167 | 1,167 | 1,167 | 1,167 | 1,167 |
| Chi2 | 231.77 | 230.02 | 231.05 | 233.48 | 227.1 | 239.36 | 231.88 |
| Number of Countries | 139 | 139 | 139 | 139 | 139 | 139 | 139 |

Notes: Robust standard errors adjusted for clustering over country appear in parentheses.

*** p<0.01, ** p<0.05, * p<0.1 All time-variant explanatory variables are lagged at *t*–1.

**Table A6. State Capacity and Human Trafficking in Destination Countries**

**(Models with the Tax/Governance, GDP, UN Protocol, and Democracy Interaction Terms)**

|  | DV: HT Forced Prostitution (Destination Country) | | | | | | |
| --- | --- | --- | --- | --- | --- | --- | --- |
| Fiscal Capacity | -2.765* | -12.712 | -4.165*** | -4.343** | -3.227** | -3.338** | -3.346** |
|  | (1.524) | (8.537) | (1.464) | (2.066) | (1.391) | (1.354) | (1.399) |
| Bureaucratic Efficacy | -0.112 | 0.060 | 0.061 | 0.074 | -0.458 | 0.004 | 0.072 |
|  | (0.129) | (0.094) | (0.091) | (0.092) | (0.358) | (0.098) | (0.091) |
| GDP per Capita | 0.562*** | 0.394* | 0.611*** | 0.584*** | 0.647*** | 0.569*** | 0.581*** |
|  | (0.147) | (0.207) | (0.147) | (0.147) | (0.156) | (0.144) | (0.147) |
| Democracy | 0.001 | 0.004 | -0.046 | 0.003 | 0.003 | 0.020 | 0.004 |
|  | (0.023) | (0.023) | (0.037) | (0.023) | (0.023) | (0.024) | (0.023) |
| UN Trafficking Protocol | 0.298 | 0.312 | 0.294 | -0.028 | 0.341 | 0.307 | 0.318 |
|  | (0.224) | (0.221) | (0.222) | (0.450) | (0.222) | (0.221) | (0.225) |
| Repression | 0.092 | 0.083 | 0.090 | 0.075 | 0.085 | 0.089 | 0.077 |
|  | (0.061) | (0.061) | (0.062) | (0.062) | (0.062) | (0.062) | (0.062) |
| Worker Rights | -0.061 | -0.059 | -0.090 | -0.074 | -0.094 | -0.126 | -0.072 |
|  | (0.193) | (0.194) | (0.197) | (0.195) | (0.195) | (0.195) | (0.194) |
| Women's Econ. Rights | -0.327* | -0.327* | -0.361** | -0.328* | -0.357** | -0.379** | -0.338** |
|  | (0.172) | (0.171) | (0.173) | (0.169) | (0.170) | (0.177) | (0.168) |
| Population | 0.447*** | 0.430*** | 0.461*** | 0.446*** | 0.461*** | 0.425*** | 0.441*** |
|  | (0.122) | (0.123) | (0.122) | (0.122) | (0.123) | (0.123) | (0.122) |
| HT Source Country | -0.051 | -0.039 | -0.057 | -0.100 | -0.041 | -0.046 | -0.067 |
|  | (0.324) | (0.325) | (0.322) | (0.329) | (0.313) | (0.328) | (0.323) |
| Time Trend | -0.390*** | -0.385*** | -0.386*** | -0.381*** | -0.390*** | -0.383*** | -0.379*** |
|  | (0.043) | (0.043) | (0.043) | (0.043) | (0.042) | (0.043) | (0.043) |
| Last HT Incidence | 0.305*** | 0.302*** | 0.301*** | 0.300*** | 0.295*** | 0.296*** | 0.299*** |
|  | (0.041) | (0.041) | (0.041) | (0.041) | (0.041) | (0.041) | (0.041) |
| Report Count | -0.014** | -0.015** | -0.017** | -0.017** | -0.019** | -0.018** | -0.016** |
|  | (0.007) | (0.007) | (0.007) | (0.007) | (0.007) | (0.007) | (0.007) |
| Fiscal Cap.* Bur. Cap. | 1.040** |  |  |  |  |  |  |
|  | (0.498) |  |  |  |  |  |  |
| Fiscal Cap.* GDP |  | 1.158 |  |  |  |  |  |
|  |  | (1.067) |  |  |  |  |  |
| Fiscal Cap.*Democracy |  |  | 0.287 |  |  |  |  |
|  |  |  | (0.187) |  |  |  |  |
| Fiscal Cap.*UN Protocol |  |  |  | 2.111 |  |  |  |
|  |  |  |  | (2.458) |  |  |  |
| Bur Eff.* GDP |  |  |  |  | 0.060* |  |  |
|  |  |  |  |  | (0.037) |  |  |
| Bur Eff.*Democracy |  |  |  |  |  | 0.017* |  |
|  |  |  |  |  |  | (0.009) |  |
| Bur Eff.*UN Protocol |  |  |  |  |  |  | 0.009 |
|  |  |  |  |  |  |  | (0.076) |
| Observations | 1,167 | 1,167 | 1,167 | 1,167 | 1,167 | 1,167 | 1,167 |
| Chi2 | 156.77 | 142.47 | 138.28 | 136.88 | 153.78 | 140.29 | 134.6 |
| Number of Countries | 139 | 139 | 139 | 139 | 139 | 139 | 139 |

Notes: Robust standard errors adjusted for clustering over country appear in parentheses.

*** p<0.01, ** p<0.05, * p<0.1 All time-variant explanatory variables are lagged at *t*–1.

**Table A7. State Capacity and Human Trafficking in Source Countries**

**(Models with Country and Region Fixed-effects)**

|  | Country Fixed Effects | | | Region Fixed Effects | | |  |  |
| --- | --- | --- | --- | --- | --- | --- | --- | --- |
|  | HT Forced Labor  (Source Country) | HT Forced Prost.  (Source Country) | HT Forced Labor/Prost  (Source Country) | HT Forced Labor  (Source Country) | HT Forced Prost.  (Source Country) | HT Forced Labor/Prost.  (Source Country) |  |  |
| Fiscal Capacity | -15.602** | -14.962 | -34.721* | -2.203* | -1.592 | -2.544** |
|  | (7.549) | (23.749) | (19.552) | (1.216) | (1.212) | (1.278) |
| Bureaucratic Efficacy | -1.502*** | 0.572 | -0.972 | -0.022 | 0.098 | 0.160 |
|  | (0.515) | (0.583) | (1.432) | (0.086) | (0.106) | (0.112) |
| GDP per Capita | -3.718* | -9.776** | 4.114 | -0.792*** | -0.774*** | -1.071*** |
|  | (2.133) | (4.963) | (9.561) | (0.170) | (0.222) | (0.263) |
| Democracy | 0.129 | 0.106 | -0.082 | -0.051** | -0.024 | -0.041 |
|  | (0.143) | (0.141) | (0.450) | (0.026) | (0.033) | (0.040) |
| UN Trafficking Protocol | 0.423 | 0.245 | 0.111 | 0.368 | 0.595** | 0.610* |
|  | (0.625) | (0.834) | (0.924) | (0.234) | (0.281) | (0.312) |
| Repression | -0.075 | -0.108 | -0.319 | 0.119 | 0.147 | 0.135 |
|  | (0.202) | (0.313) | (0.503) | (0.084) | (0.094) | (0.116) |
| Worker Rights | -0.480 | -0.621 | -1.830* | 0.094 | -0.206 | -0.460 |
|  | (0.397) | (0.764) | (0.987) | (0.191) | (0.270) | (0.281) |
| Women's Econ. Rights | 0.230 | 1.053 | 1.565** | -0.101 | -0.256 | -0.185 |
|  | (0.311) | (0.676) | (0.751) | (0.188) | (0.235) | (0.252) |
| Population | -7.323 | -21.452 | 2.755 | 0.681*** | 0.835*** | 0.858*** |
|  | (7.070) | (22.358) | (22.306) | (0.125) | (0.151) | (0.169) |
| HT Destination Country | 0.650 | -0.228 | 32.188*** | 0.334 | 0.025 | -0.026 |
|  | (0.626) | (0.997) | (2.715) | (0.267) | (0.320) | (0.340) |
| Time Trend | 0.170** | 0.401*** | 0.450*** | -0.470*** | -0.491*** | -0.464*** |
|  | (0.083) | (0.147) | (0.169) | (0.054) | (0.074) | (0.078) |
| Last HT Incidence | 1.157*** | 2.076*** | 1.480** | 0.528*** | 0.477*** | 0.468*** |
|  | (0.180) | (0.674) | (0.579) | (0.047) | (0.058) | (0.059) |
| Report Count | 0.003 | -0.036 | 0.100 | -0.017** | -0.021** | -0.021** |
|  | (0.047) | (0.110) | (0.132) | (0.008) | (0.009) | (0.009) |
| Observations | 639 | 409 | 345 | 1,135 | 1,135 | 1,135 |
| Chi2 | 153.07 | 71.73 |  | 371.38 | 340.96 | 323.48 |

Notes: Standard errors appear in parentheses. *** p<0.01, ** p<0.05, * p<0.1 All time-variant explanatory variables are lagged at *t*–1.

**Table A8. State Capacity and Human Trafficking in Destination Countries**

**(Models with Country and Region Fixed-effects)**

|  | Country Fixed Effects | | | Region Fixed Effects | | |
| --- | --- | --- | --- | --- | --- | --- |
|  | HT Forced Labor  (Dest. Country) | HT Forced Prost.  (Dest. Country) | HT Forced Labor/Prost  (Dest. Country) | HT Forced Labor  (Dest. Country) | HT Forced Prost.  (Dest. Country) | HT Forced Labor/Prost.  (Dest. Country) |
| Fiscal Capacity | -8.582* | -8.130** | -15.253** | -4.367*** | -3.599*** | -4.756*** |
|  | (4.860) | (3.689) | (6.456) | (1.148) | (1.173) | (1.415) |
| Bureaucratic Efficacy | -0.294 | -0.680 | -2.062*** | -0.116 | -0.122 | -0.126 |
|  | (0.544) | (0.444) | (0.678) | (0.079) | (0.083) | (0.101) |
| GDP per Capita | 0.888 | 4.644** | 7.407** | 1.093*** | 0.862*** | 1.109*** |
|  | (3.128) | (2.048) | (3.321) | (0.154) | (0.142) | (0.175) |
| Democracy | 0.143 | 0.103 | 0.074 | -0.053** | 0.013 | -0.027 |
|  | (0.139) | (0.090) | (0.176) | (0.021) | (0.020) | (0.023) |
| UN Trafficking Protocol | 0.790 | 0.302 | -0.071 | 0.189 | 0.319 | 0.288 |
|  | (0.611) | (0.502) | (0.669) | (0.216) | (0.219) | (0.247) |
| Repression | -0.265 | 0.167 | -0.063 | 0.079 | 0.213*** | 0.269*** |
|  | (0.182) | (0.160) | (0.206) | (0.069) | (0.071) | (0.081) |
| Worker Rights | 0.094 | -0.255 | -0.780* | 0.019 | -0.221 | -0.414* |
|  | (0.338) | (0.391) | (0.441) | (0.194) | (0.195) | (0.219) |
| Women's Econ. Rights | -0.460 | -0.678** | -0.499 | -0.310* | -0.354** | -0.398** |
|  | (0.291) | (0.283) | (0.322) | (0.166) | (0.172) | (0.179) |
| Population | -23.336*** | -0.043 | -17.380* | 0.582*** | 0.448*** | 0.480*** |
|  | (8.856) | (2.632) | (9.516) | (0.103) | (0.099) | (0.106) |
| HT Source Country | 3.254** | 1.555 | 33.528*** | 0.631** | 0.566* | 0.562* |
|  | (1.471) | (1.311) | (2.771) | (0.318) | (0.327) | (0.340) |
| Time Trend | 0.026 | -0.058 | 0.109 | -0.591*** | -0.667*** | -0.765*** |
|  | (0.085) | (0.078) | (0.114) | (0.053) | (0.066) | (0.082) |
| Last HT Incidence | 1.147*** | 0.437*** | 0.855*** | 0.465*** | 0.316*** | 0.337*** |
|  | (0.179) | (0.112) | (0.170) | (0.045) | (0.040) | (0.047) |
| Report Count | 0.033*** | 0.003 | 0.025** | -0.011*** | -0.019*** | -0.021*** |
|  | (0.011) | (0.011) | (0.012) | (0.004) | (0.004) | (0.005) |
| Observations | 805 | 635 | 544 | 1,135 | 1,135 | 1,135 |
| Chi2 | 215.39 | 233.53 |  | 278.45 | 225.52 | 221.75 |

Notes: Standard errors appear in parentheses. *** p<0.01, ** p<0.05, * p<0.1 All time-variant explanatory variables are lagged at *t*–1.

**Table A9. State Capacity and Human Trafficking in Destination Countries**

**(Ordered Logit Models with the UNODC HT Inflows data)**

|  | DV: HT Outflows  (UNODC – Origin Country) | | DV: HT Outflows  (UNODC – Dest. Country) | |
| --- | --- | --- | --- | --- |
| Fiscal Capacity | -4.917* |  | -4.760* |  |
|  | (2.615) |  | (2.500) |  |
| Bureaucratic Efficacy |  | -0.368*** |  | -0.152 |
|  |  | (0.131) |  | (0.130) |
| GDP per Capita | -0.266* | -0.054 | 1.174*** | 1.224*** |
|  | (0.153) | (0.178) | (0.178) | (0.215) |
| Democracy | 0.083** | 0.079** | -0.010 | -0.002 |
|  | (0.033) | (0.032) | (0.032) | (0.032) |
| UN Trafficking Protocol | 0.875** | 0.743** | 0.125 | 0.008 |
|  | (0.358) | (0.356) | (0.360) | (0.361) |
| Repression | 0.081 | 0.225* | 0.234* | 0.292** |
|  | (0.118) | (0.129) | (0.128) | (0.137) |
| Worker Rights | -1.089*** | -0.857*** | -0.018 | 0.156 |
|  | (0.309) | (0.323) | (0.297) | (0.324) |
| Women's Econ. Rights | -0.075 | 0.231 | -0.207 | -0.125 |
|  | (0.286) | (0.287) | (0.298) | (0.302) |
| Population | 0.299** | 0.509*** | 0.745*** | 0.828*** |
|  | (0.140) | (0.150) | (0.157) | (0.169) |
| Source Country | 1.592*** | 1.390*** | 1.678*** | 1.694*** |
|  | (0.443) | (0.445) | (0.457) | (0.460) |
| Observations | 140 | 140 | 140 | 140 |
| Lr Chi2 | 79.78 | 82.72 | 109.81 | 108.65 |

Notes: Standard errors appear in parentheses. *** p<0.01, ** p<0.05, * p<0.1

**Table A10. State Capacity and Human Trafficking in Destination Countries**

**(Additional Models with the Foreign and Domestic Movement Variables)**

|  | DV: HT Forced Labor  (Source Country) | DV: HT Forced Prost.  (Source Country) | DV: HT Forced Labor  (Dest. Country) | DV: HT Forced Prost.  (Dest. Country) |
| --- | --- | --- | --- | --- |
| Fiscal Capacity | -3.699** | -5.265*** | -2.581** | -3.355** |
|  | (1.834) | (1.584) | (1.265) | (1.431) |
| Bureaucratic Efficacy | -0.058 | -0.176 | 0.050 | 0.106 |
|  | (0.104) | (0.115) | (0.081) | (0.096) |
| GDP per Capita | -0.784*** | -0.400 | 0.499*** | 0.551*** |
|  | (0.217) | (0.258) | (0.139) | (0.147) |
| Democracy | 0.023 | 0.085** | -0.060** | 0.020 |
|  | (0.030) | (0.036) | (0.026) | (0.026) |
| UN Trafficking Protocol | 0.380 | 0.361 | 0.332 | 0.330 |
|  | (0.237) | (0.220) | (0.211) | (0.216) |
| Repression | 0.061 | 0.127 | 0.055 | 0.095 |
|  | (0.084) | (0.101) | (0.083) | (0.061) |
| Worker Rights | -0.087 | -0.366** | -0.001 | -0.076 |
|  | (0.200) | (0.185) | (0.168) | (0.195) |
| Women's Econ. Rights | 0.069 | 0.001 | -0.313** | -0.333* |
|  | (0.163) | (0.149) | (0.155) | (0.173) |
| Population | 0.580*** | 0.672*** | 0.464*** | 0.426*** |
|  | (0.134) | (0.158) | (0.113) | (0.121) |
| HT Source/Dest. Country | 0.142 | -0.396 | 0.139 | -0.034 |
|  | (0.226) | (0.276) | (0.320) | (0.320) |
| Time Trend | 0.467*** | 0.361*** | 0.423*** | 0.301*** |
|  | (0.050) | (0.045) | (0.042) | (0.041) |
| Last HT Incidence | -0.319*** | -0.355*** | -0.425*** | -0.386*** |
|  | (0.041) | (0.046) | (0.040) | (0.043) |
| Report Count | -0.019*** | -0.034*** | -0.008 | -0.017** |
|  | (0.006) | (0.007) | (0.006) | (0.007) |
| Foreign Movement | 0.013 | 0.198 | -0.168 | -0.190 |
|  | (0.199) | (0.162) | (0.180) | (0.181) |
| Domestic Movement | 0.002 | 0.213 | -0.282 | -0.180 |
|  | (0.198) | (0.237) | (0.198) | (0.166) |
| Observations | 1,167 | 1,167 | 1,167 | 1,167 |
| Chi2 | 232.82 | 223.11 | 234.7 | 136 |
| Number of Countries | 139 | 139 | 139 | 139 |

Notes: Robust standard errors adjusted for clustering over country appear in parentheses.

*** p<0.01, ** p<0.05, * p<0.1 All time-variant explanatory variables are lagged at *t*–1.

**Table A11. State Capacity and Human Trafficking in Destination Countries**

**(Additional Models with the CIRI Judicial Independence Measure Variable)**

|  | DV: HT Forced Labor  (Source Country) | DV: HT Forced Prost.  (Source Country) | DV: HT Forced Labor  (Dest. Country) | DV: HT Forced Prost.  (Dest. Country) |
| --- | --- | --- | --- | --- |
| Fiscal Capacity | -4.030** | -5.545*** | -2.677** | -2.950** |
|  | (1.778) | (1.547) | (1.281) | (1.427) |
| CIRI Judicial Indp. | 0.280 | -0.052 | -0.112 | 0.063 |
|  | (0.205) | (0.208) | (0.158) | (0.189) |
| GDP per Capita | -0.920*** | -0.579*** | 0.572*** | 0.633*** |
|  | (0.152) | (0.189) | (0.118) | (0.112) |
| Democracy | 0.004 | 0.099*** | -0.081*** | 0.011 |
|  | (0.030) | (0.036) | (0.027) | (0.023) |
| UN Trafficking Protocol | 0.468** | 0.356* | 0.261 | 0.317 |
|  | (0.226) | (0.199) | (0.207) | (0.227) |
| Repression | 0.049 | 0.097 | 0.041 | 0.084 |
|  | (0.083) | (0.094) | (0.076) | (0.060) |
| Worker Rights | -0.159 | -0.371** | -0.039 | -0.065 |
|  | (0.182) | (0.152) | (0.159) | (0.165) |
| Women's Econ. Rights | 0.066 | -0.044 | -0.220 | -0.260 |
|  | (0.153) | (0.135) | (0.144) | (0.168) |
| Population | 0.609*** | 0.614*** | 0.409*** | 0.413*** |
|  | (0.132) | (0.153) | (0.110) | (0.114) |
| HT Source/Dest. Country | 0.194 | -0.351 | 0.105 | -0.207 |
|  | (0.227) | (0.246) | (0.296) | (0.308) |
| Time Trend | -0.317*** | 0.339*** | 0.410*** | 0.306*** |
|  | (0.038) | (0.040) | (0.039) | (0.039) |
| Last HT Incidence | 0.484*** | -0.324*** | -0.389*** | -0.354*** |
|  | (0.047) | (0.039) | (0.035) | (0.040) |
| Report Count | -0.019*** | -0.029*** | -0.007 | -0.015** |
|  | (0.006) | (0.006) | (0.005) | (0.007) |
| Observations | 1,167 | 1,167 | 1,167 | 1,167 |
| Chi2 | 258.06 | 180.32 | 234.68 | 148.47 |
| Number of Countries | 139 | 139 | 139 | 139 |

Notes: Robust standard errors adjusted for clustering over country appear in parentheses.

*** p<0.01, ** p<0.05, * p<0.1 All time-variant explanatory variables are lagged at *t*–1.

**Table A12. State Capacity and Human Trafficking**

**(Ordered Logit Models with the Prevention Outcome Variable)**

|  | DV: HT Prevention | | |
| --- | --- | --- | --- |
| Fiscal Capacity | 0.469 |  | 0.328 |
|  | (0.764) |  | (0.801) |
| Bureaucratic Capacity |  | 0.106*** | 0.103** |
|  |  | (0.041) | (0.041) |
| GDP per Capita | 0.124*** | 0.022 | 0.019 |
|  | (0.047) | (0.062) | (0.063) |
| Democracy | 0.040*** | 0.046*** | 0.042*** |
|  | (0.011) | (0.012) | (0.012) |
| UN Trafficking Protocol | 0.106 | 0.114 | 0.154 |
|  | (0.131) | (0.133) | (0.135) |
| Repression | 0.089** | 0.065 | 0.068* |
|  | (0.038) | (0.041) | (0.041) |
| Worker Rights | 0.370*** | 0.246** | 0.233** |
|  | (0.108) | (0.116) | (0.116) |
| Women's Econ. Rights | 0.187* | 0.078 | 0.146 |
|  | (0.096) | (0.097) | (0.098) |
| Population | 0.231*** | 0.189*** | 0.204*** |
|  | (0.055) | (0.058) | (0.058) |
| Time Trend | 0.049** | 0.064*** | 0.063*** |
|  | (0.020) | (0.021) | (0.021) |
| Report Count | -0.005 | -0.004 | -0.004 |
|  | (0.004) | (0.004) | (0.004) |
| Past Prevention | 1.789*** | 1.907*** | 1.855*** |
|  | (0.095) | (0.094) | (0.095) |
| Observations | 1,376 | 1,304 | 1,288 |
| Chi2 | 662.44 | 700.5 | 670.65 |

Notes: Robust standard errors adjusted for clustering over country appear in parentheses.

*** p<0.01, ** p<0.05, * p<0.1 All time-variant explanatory variables are lagged at *t*–1.

**Table A13. Summary Statistics**

|  | Mean | Std. Dev. | Min | Max |
| --- | --- | --- | --- | --- |
| HT Forced Labor (Source) | 0.563 | 0.496 | 0 | 1 |
| HT Forced Prost. (Source) | 0.671 | 0.470 | 0 | 1 |
| HT Forced Labor/Prost. (Source) | 0.697 | 0.460 | 0 | 1 |
| HT Forced Labor (Destination) | 0.589 | 0.492 | 0 | 1 |
| HT Forced Prost. (Destination) | 0.693 | 0.461 | 0 | 1 |
| HT Forced Labor/Prost. (Destination) | 0.744 | 0.437 | 0 | 1 |
| Fiscal Capacity | 0.165 | 0.083 | 0.002 | 0.952 |
| Bureaucratic Capacity | -0.365 | 2.956 | -7.043 | 6.881 |
| GDP per Capita (logged) | 7.946 | 1.627 | 4.776 | 11.382 |
| Democracy | 3.649 | 6.398 | -10 | 10 |
| UN Trafficking Protocol | 0.488 | 0.500 | 0 | 1 |
| Repression | 4.700 | 2.190 | 0 | 8 |
| Worker Rights | 0.816 | 0.683 | 0 | 2 |
| Women's Econ. Rights | 1.296 | 0.740 | 0 | 3 |
| Population (logged) | 16.118 | 1.519 | 12.903 | 21.019 |
| Time Trend (in 1000s) | 2006.111 | 3.764 | 2000 | 2012 |
| Report Count | 10.745 | 21.815 | 0.07 | 355.361 |
| Last HT Incidence (F. Labor Source) | 1.574 | 2.492 | 0 | 10 |
| Last HT Incidence (F. Prost Source) | 1.242 | 2.362 | 0 | 10 |
| Last HT Incidence (F. Lab/Prost Source) | 1.151 | 2.312 | 0 | 10 |
| Last HT Incidence (F. Labor Dest) | 1.354 | 2.221 | 0 | 10 |
| Last HT Incidence (F. Prost Dest) | 0.947 | 1.912 | 0 | 10 |
| Last HT Incidence (F. Lab/Prost Dest) | 0.798 | 1.799 | 0 | 10 |

**
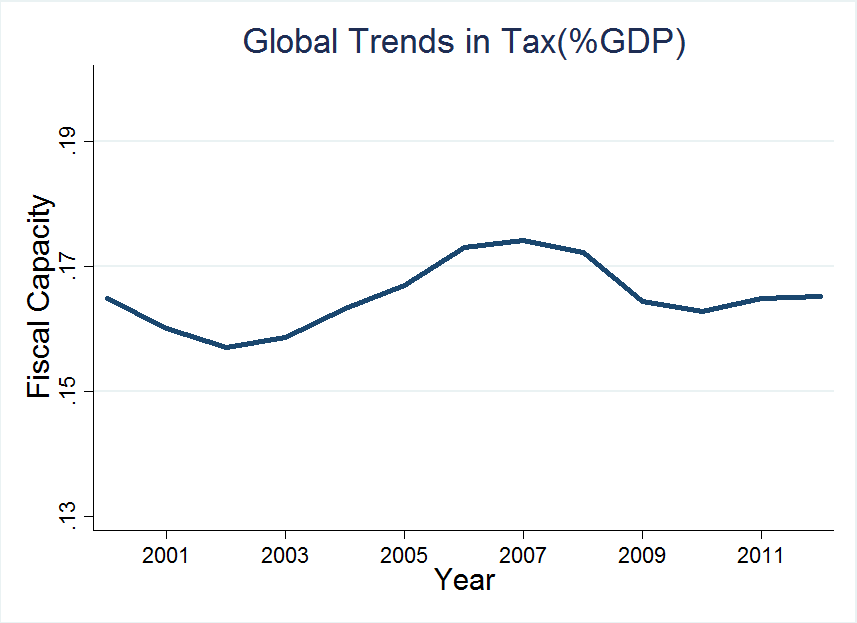
**

**
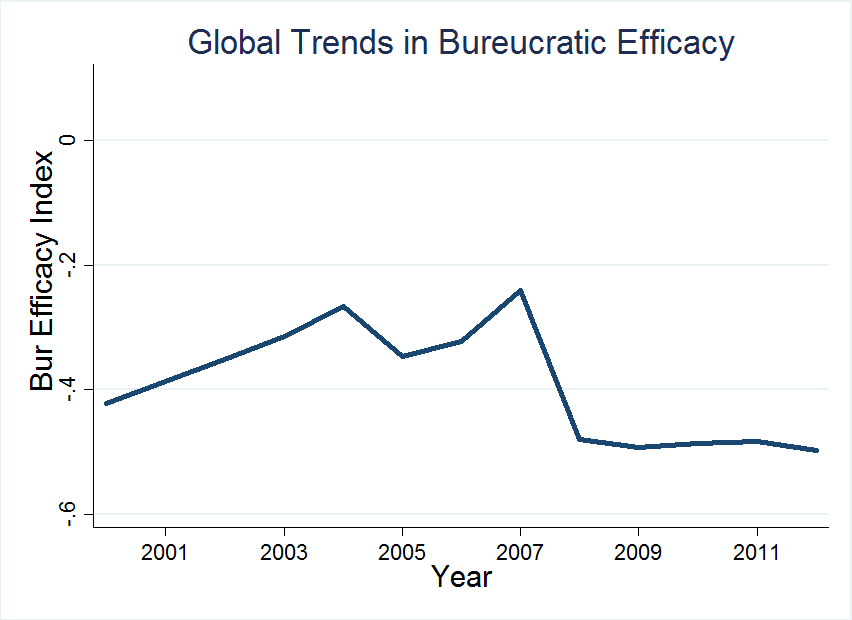
**

**
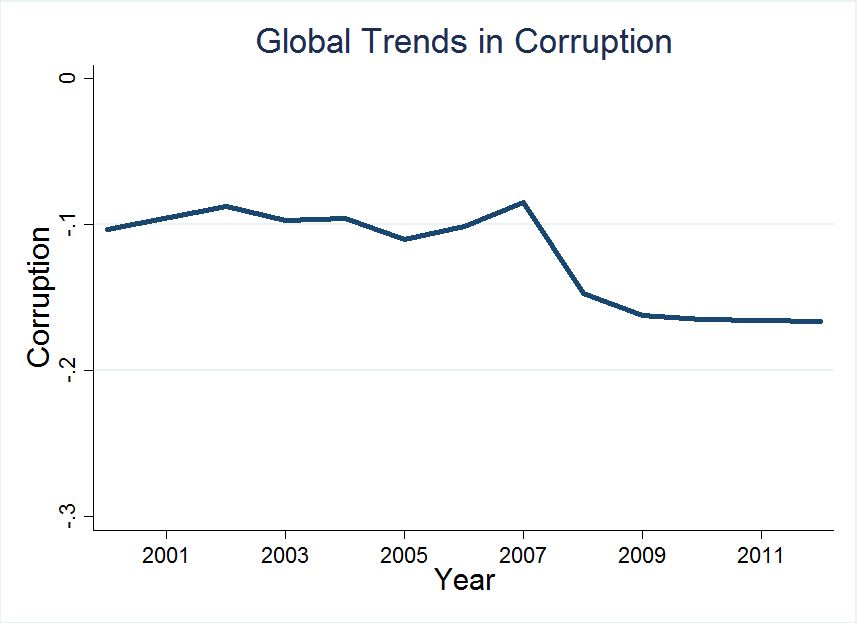
**

**
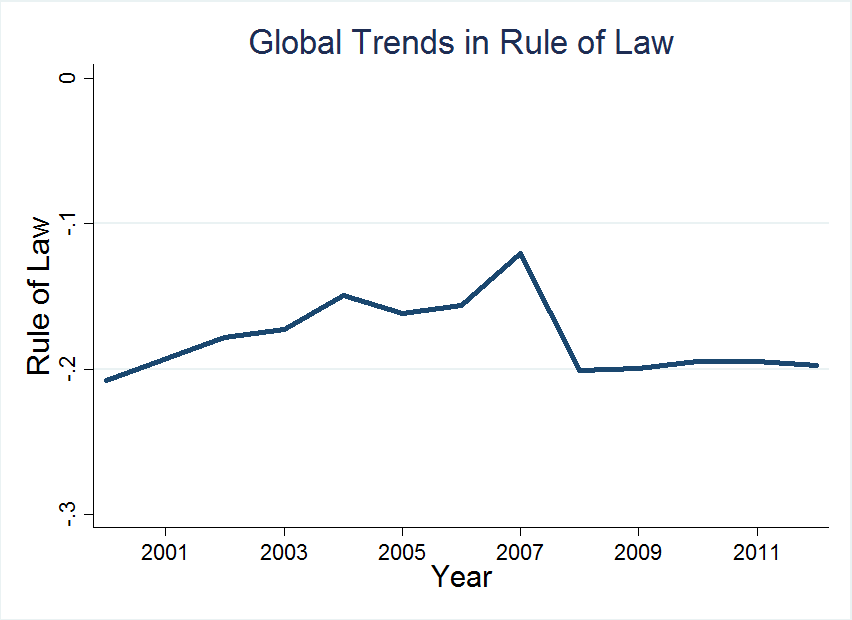
**

**
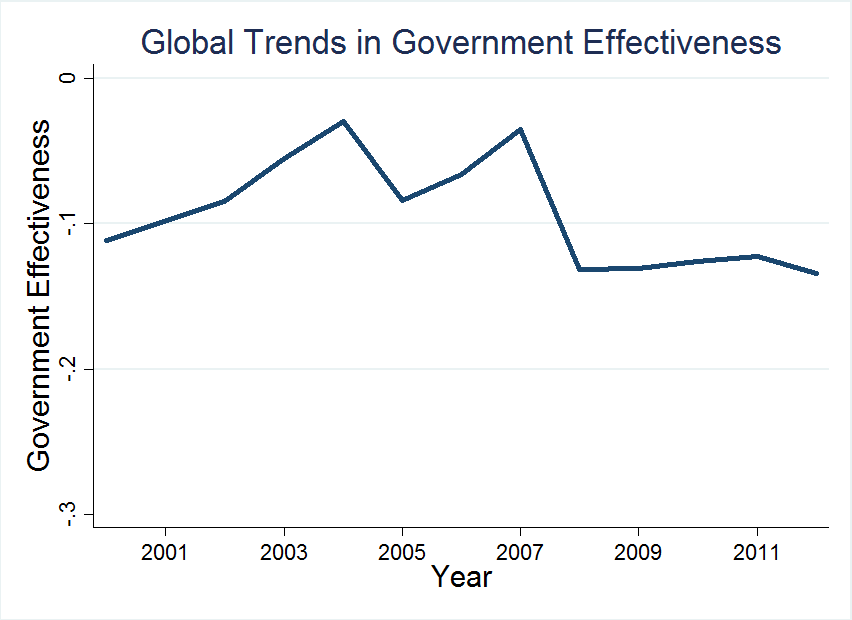
**
